# Supplementary material for: Association of Immune Related Adverse Events With Efficacy of Immune Checkpoint Inhibitors and Overall Survival in Cancers: A Systemic Review and Meta-analysis
Source: PubMed Central journal article supplement (PMC8072154; doi:10.3389/fonc.2021.633032), 2021-04-12
Supplement: DataSheet_1.pdf [file DataSheet_1.pdf]

**Supplementary Figure S1.** Sensitivity analysis by omitting the study one by one (outcome: ORR). A: original analysis; B: analysis when excluding one study

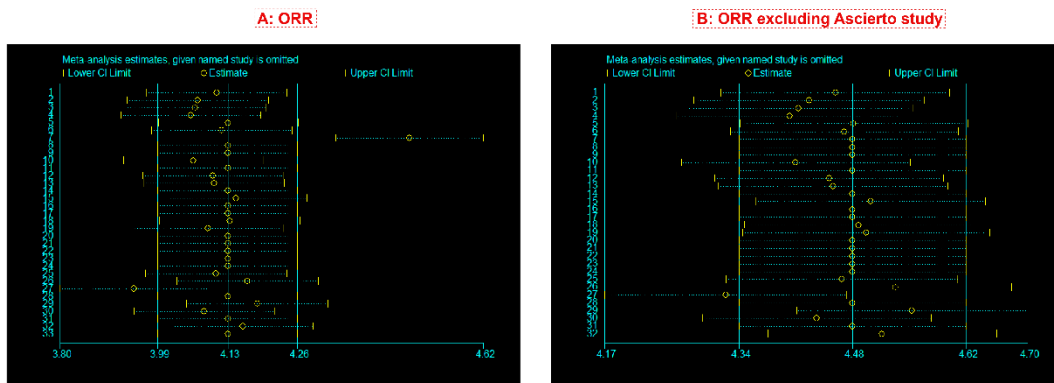

**Supplementary Figure S2.** Sensitivity analysis by omitting the study one by one (outcomes: PFS and OS). A: PFS; B: OS

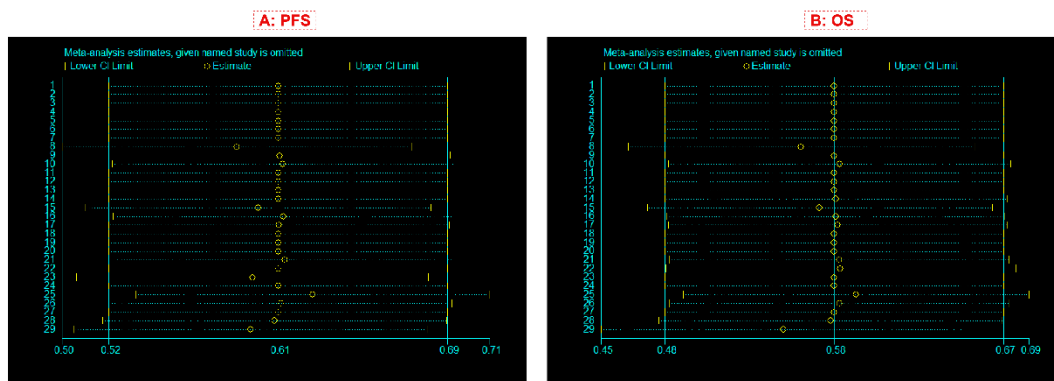

**Supplementary Figure S3.** Funnel plot of the ORR (A), PFS (B) and OS (C) results.

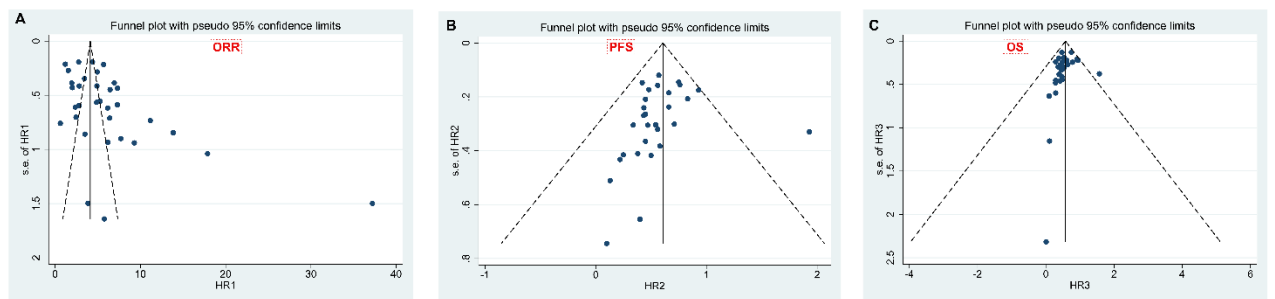

**Supplementary compressed package:** Detailed results of subgroup analysis stratified by ICI types, cancer types, regional distribution, study design and site-specific irAEs.





|    |          |      |                            |     |         |      |      |                   |                        |                        |  |  |  |  |  |  |  |  |  |   |
|----|----------|------|----------------------------|-----|---------|------|------|-------------------|------------------------|------------------------|--|--|--|--|--|--|--|--|--|---|
| 19 | Weber    | 2017 | PD-1                       | 576 | 348/228 | 61   | 7.2  | Mixed             |                        |                        |  |  |  |  |  |  |  |  |  | 6 |
| 20 | Yamazaki | 2017 | PD-1                       | 24  | 10/14   | 63   | 18.8 | Mixed             | 0.16<br>(0.05-0.48)    |                        |  |  |  |  |  |  |  |  |  | 9 |
| 21 | Faje     | 2018 | CTLA-4                     | 281 | /       | /    | /    | hypophysitis      |                        |                        |  |  |  |  |  |  |  |  |  | 7 |
| 22 | Fujimoto | 2018 | PD-1                       | 613 | 433/180 | 66.9 | /    | Mixed (Grade 3-5) |                        |                        |  |  |  |  |  |  |  |  |  | 7 |
| 23 | Fujisawa | 2018 | CTLA-4 after PD-1          | 60  | 30/30   | 63.3 | /    | Mixed             | 2.78<br>(1.012-7.642)  |                        |  |  |  |  |  |  |  |  |  | 6 |
| 24 | Haratani | 2018 | PD-1                       | 134 | 90/44   | 68   | /    | Mixed             | 0.476<br>(0.232-0.912) | 0.209<br>(0.049-0.618) |  |  |  |  |  |  |  |  |  | 7 |
| 25 | Kostine  | 2018 | monotherapy or combination | 524 | 360/164 | 64.5 | /    | Mixed             |                        |                        |  |  |  |  |  |  |  |  |  | 8 |
| 26 | Lesueur  | 2018 | PD-1                       | 104 | 67/37   | 60.3 | /    | Mixed             |                        |                        |  |  |  |  |  |  |  |  |  | 7 |
| 27 | Lisberg  | 2018 | PD-1                       | 97  | 50/47   | 65   | /    | Mixed             |                        |                        |  |  |  |  |  |  |  |  |  | 7 |
| 28 | Min Lee  | 2018 | PD-1/PD-1                  | 114 | 62/52   | 65.9 | /    | Dermatitis        |                        |                        |  |  |  |  |  |  |  |  |  | 6 |
| 29 | Owen     | 2018 | 1/PD-1                     | 91  | 39/52   | 67   | /    | Mixed             |                        |                        |  |  |  |  |  |  |  |  |  | 7 |

0.542 0.285  
(0.29 0.10  
5- 2-  
0.971 0.675  
) )

0.53 (0.36-0.75)

0.71  
(0.52-0.97)

0.22  
(0.064-0.743)

0.237 0.504  
(0.037- (0.027-  
0.842) 2.629)

|    |            |      |                         |     |         |      |      |                  |                        |                        |                        |                        |                        |                        |  |  |  |                     |   |
|----|------------|------|-------------------------|-----|---------|------|------|------------------|------------------------|------------------------|------------------------|------------------------|------------------------|------------------------|--|--|--|---------------------|---|
| 30 | Sato       | 2018 | PD-1                    | 38  | 28/10   | 68.5 | 5.2  | Mixed            |                        |                        |                        |                        |                        |                        |  |  |  | 0.28<br>(0.04-1.46) | 8 |
| 31 | Shafqat    | 2018 | PD-1/PD-L1              | 157 | 100/57  | 65   | 6.7  | Mixed            |                        |                        |                        |                        |                        |                        |  |  |  |                     | 7 |
| 32 | Suh        | 2018 | PD-1                    | 54  | 42/12   | 68   | 26.2 | Mixed            |                        |                        |                        |                        |                        |                        |  |  |  |                     | 8 |
| 33 | Toi        | 2018 | PD-1                    | 137 | 105/32  | 68   | /    | Mixed            |                        |                        |                        |                        |                        |                        |  |  |  |                     | 8 |
| 34 | Abu-Sbeih  | 2019 | monotherapy or combined | 346 | 222/124 | 58.4 | 20.4 | Diarrhea/colitis | 0.56<br>(0.41-0.76)    | 0.53<br>(0.36-0.78)    | 0.52<br>(0.29-0.94)    | 0.58 (0.01-0.37)       |                        |                        |  |  |  |                     | 8 |
| 35 | Ahn        | 2019 | PD-1                    | 111 | /       | /    | /    | Mixed            | 0.643<br>(0.350-1.180) | 0.420<br>(0.162-1.087) | 0.368<br>(0.132-1.028) | 0.255<br>(0.051-1.288) | 0.434<br>(0.256-0.735) | 0.484<br>(0.255-0.919) |  |  |  |                     | 6 |
| 36 | Berner     | 2019 | PD-1                    | 73  | 44/29   | 68   | /    | skin             | 0.22<br>(0.09-0.49)    | 0.29<br>(0.12-0.71)    |                        |                        |                        |                        |  |  |  | 8                   |   |
| 37 | Bjornhart  | 2019 | Mixed ICIs              | 118 | 55/63   | 66   | 15.7 | Mixed            |                        |                        |                        |                        |                        |                        |  |  |  |                     | 8 |
| 38 | Cortellini | 2019 | PD-1                    | 559 | 379/180 | 69   | 11.2 | Mixed            | 0.46<br>(0.31-0.69)    | 0.43<br>(0.27-0.70)    | 0.63<br>(0.45-0.89)    | 0.55 (0.37-0.83)       | 0.59<br>(0.47-0.76)    | 0.55<br>(0.41-0.72)    |  |  |  |                     | 8 |

|    |          |      |            |     |         |    |      |           |                                                      |                                                      |                  |                  |                  |                                      |                  |                  |                  |                  |   |
|----|----------|------|------------|-----|---------|----|------|-----------|------------------------------------------------------|------------------------------------------------------|------------------|------------------|------------------|--------------------------------------|------------------|------------------|------------------|------------------|---|
| 39 | Grangcon | 2019 | PD-1/PD-L1 | 270 | 177/93  | 61 | /    | Mixed     | hepatitis:0.97 (0.45-2.08), colitis:0.73 (0.35-1.50) | hepatitis:0.97 (0.30-3.08), colitis:0.24 (0.03-1.73) | 0.58 (0.39-0.85) | 0.46 (0.25-0.86) | 1.19 (0.52-1.70) | 1.42 (0.45-4.54)                     | 7                |                  |                  |                  |   |
| 40 | Indini   | 2019 | PD-1       | 173 | 107/66  | 62 | 9    | Mixed     |                                                      |                                                      |                  |                  |                  |                                      | 9                |                  |                  |                  |   |
| 41 | Ishihar  | 2019 | PD-1       | 47  | 37/10   | /  | /    | Mixed     |                                                      |                                                      |                  |                  |                  |                                      | 6                |                  |                  |                  |   |
| 42 | Ksienski | 2019 | PD-1       | 271 | 137/134 | 64 | 8.1  | Mixed     |                                                      |                                                      |                  |                  |                  | Grad<br>e1-2:<br>0.85<br>(0.50-1.42) | 6                |                  |                  |                  |   |
| 43 | Lang     | 2019 | CTLA-4     | 100 | 71/29   | 57 | 12.6 | Diarrhea  | 1.93 (1.01-3.68)                                     | 1.57 (0.75-3.29)                                     |                  |                  |                  |                                      | 9                |                  |                  |                  |   |
| 44 | Lei M    | 2019 | PD-1       | 103 | 60/43   | 71 | 12.8 | Thyroid   |                                                      |                                                      | 0.45 (0.27-0.76) | 0.40 (0.19-0.85) |                  |                                      | 9                |                  |                  |                  |   |
| 45 | Liew D   | 2019 | PD-1       | 244 | /       | /  | /    | Rheumatic |                                                      |                                                      |                  |                  |                  |                                      | 5                |                  |                  |                  |   |
| 46 | Okada    | 2019 | PD-1       | 15  | 4/11    | /  | /    | Mixed     |                                                      |                                                      |                  |                  |                  |                                      | 5                |                  |                  |                  |   |
| 47 | Okamoto  | 2019 | PD-1       | 100 | 79/21   | 65 | /    | Mixed     |                                                      |                                                      |                  |                  |                  |                                      | 5                |                  |                  |                  |   |
| 48 | Ricciuti | 2019 | PD-1       | 195 | 128/67  | 63 | 26   | Mixed     | 0.57 (0.35-0.95)                                     | 0.8 (0.46-1.39)                                      | 0.52 (0.3-0.9)   | 0.5 (0.26-0.98)  | 0.59 (0.4-0.9)   | 0.45 (0.28-0.72)                     | 0.56 (0.33-0.96) | 0.46 (0.24-0.89) | 0.69 (0.45-1.05) | 0.55 (0.33-0.92) | 9 |
| 49 | Rogado   | 2019 | PD-1       | 106 | 76/30   | 69 | 6    | Mixed     |                                                      |                                                      |                  |                  |                  |                                      | 9                |                  |                  |                  |   |

|    |              |      |      |     |        |      |      |         |                         |                      |   |
|----|--------------|------|------|-----|--------|------|------|---------|-------------------------|----------------------|---|
| 50 | Sakaki<br>da | 2019 | PD-1 | 150 | 101/49 | 71.5 | 7.25 | Thyroid | 0.56<br>(0.29-<br>1.02) | 0.42 (0.16-<br>0.97) | 8 |
| 51 | Verzo<br>ni  | 2019 | PD-1 | 389 | 291/98 | 65   | 11.9 | Mixed   |                         |                      | 8 |
| 52 | Yamau<br>chi | 2019 | PD-1 | 200 | 134/66 | 67   | 9.5  | thyroid | 0.66<br>(0.46-<br>0.95) | 0.61 (0.39-<br>0.93) | 8 |

**Supplementary Table 2: NOS score of enrolled studies**

| ID | Study      | Publication year | Study design                    | Selection (4☆) | Comparability (2☆) | Exposure / Outcome (3☆) | Total scores |
|----|------------|------------------|---------------------------------|----------------|--------------------|-------------------------|--------------|
| 1  | Attia      | 2005             | prospective                     | ☆☆☆☆           | ☆                  | ☆                       | 6            |
| 2  | Beck       | 2006             | retrospective                   | ☆☆☆            | ☆                  | ☆                       | 5            |
| 3  | Downey     | 2007             | Two trials                      | ☆☆☆☆           | ☆                  | ☆                       | 6            |
| 4  | Yang       | 2007             | phase II trial                  | ☆☆☆            | ☆                  | ☆                       | 5            |
| 5  | Weber      | 2008             | Phase I/II RCT study            | ☆☆☆☆           | ☆                  | ☆                       | 6            |
| 6  | Ku GY      | 2010             | retrospective                   | ☆☆☆            | ☆                  | ☆                       | 5            |
| 7  | Ascierto   | 2014             | retrospective                   | ☆☆☆            | ☆                  | ☆☆☆                     | 7            |
| 8  | Horvat     | 2015             | retrospective                   | ☆☆☆            | ☆                  | ☆                       | 5            |
| 9  | Sanlorenzo | 2015             | retrospective                   | ☆☆☆            | ☆☆                 | ☆☆                      | 7            |
| 10 | Dick       | 2016             | retrospective retrospective     | ☆☆☆            | ☆☆                 | ☆☆☆                     | 8            |
| 11 | Freeman    | 2016             | analysis of two phase I studies | ☆☆             | ☆☆                 | ☆☆                      | 6            |
| 12 | Hasan      | 2016             | retrospective                   | ☆☆☆            | ☆                  | ☆                       | 5            |
| 13 | Hua        | 2016             | prospective                     | ☆☆☆☆           | ☆                  | ☆☆                      | 7            |
| 14 | Nakamura   | 2016             | retrospective                   | ☆☆☆            | ☆☆                 | ☆                       | 6            |
| 15 | Judd J     | 2017             | retrospective                   | ☆☆☆            | ☆                  | ☆                       | 5            |
| 16 | Kim        | 2017             | prospective retrospective       | ☆☆☆☆           | ☆☆                 | ☆☆☆                     | 9            |
| 17 | Osorio     | 2017             | analysis of KEYNOTE-1           | ☆☆☆            | ☆☆                 | ☆☆                      | 7            |
| 18 | Teraoka    | 2017             | prospective                     | ☆☆☆☆           | ☆                  | ☆                       | 6            |
| 19 | Weber      | 2017             | retrospective                   | ☆☆☆            | ☆                  | ☆☆                      | 6            |
| 20 | Yamazaki   | 2017             | phase II trial                  | ☆☆☆☆           | ☆☆                 | ☆☆☆                     | 9            |
| 21 | Faje       | 2018             | retrospective                   | ☆☆☆            | ☆☆                 | ☆☆                      | 7            |
| 22 | Fujimoto   | 2018             | retrospective                   | ☆☆☆            | ☆☆                 | ☆☆                      | 7            |
| 23 | Fujisawa   | 2018             | retrospective                   | ☆☆☆            | ☆☆                 | ☆                       | 6            |
| 24 | Haratani   | 2018             | retrospective                   | ☆☆☆            | ☆☆                 | ☆☆                      | 7            |
| 25 | Kostine    | 2018             | prospective                     | ☆☆☆☆           | ☆                  | ☆☆☆                     | 8            |
| 26 | Lesueur    | 2018             | retrospective retrospective     | ☆☆☆            | ☆☆                 | ☆☆                      | 7            |
| 27 | Lisberg    | 2018             | analysis of KEYNOTE-1           | ☆☆☆            | ☆☆                 | ☆☆                      | 7            |
| 28 | Min Lee    | 2018             | retrospective                   | ☆☆☆            | ☆                  | ☆☆                      | 6            |
| 29 | Owen       | 2018             | retrospective                   | ☆☆☆            | ☆☆                 | ☆☆                      | 7            |
| 30 | Sato       | 2018             | prospective                     | ☆☆☆☆           | ☆                  | ☆☆☆                     | 8            |
| 31 | Shafqat    | 2018             | retrospective                   | ☆☆☆            | ☆☆                 | ☆☆                      | 7            |
| 32 | Suh        | 2018             | retrospective                   | ☆☆☆            | ☆☆                 | ☆☆☆                     | 8            |
| 33 | Toi        | 2018             | retrospective                   | ☆☆☆☆           | ☆☆                 | ☆☆                      | 8            |
| 34 | Abu-Sbeih  | 2019             | retrospective                   | ☆☆☆            | ☆☆                 | ☆☆☆                     | 8            |
| 35 | Ahn        | 2019             | retrospective                   | ☆☆☆            | ☆☆                 | ☆                       | 6            |
| 36 | Berner     | 2019             | prospective                     | ☆☆☆☆           | ☆☆                 | ☆☆                      | 8            |
| 37 | Bjornhart  | 2019             | retrospective                   | ☆☆☆            | ☆☆                 | ☆☆☆                     | 8            |
| 38 | Cortellini | 2019             | retrospective                   | ☆☆☆            | ☆☆                 | ☆☆☆                     | 8            |
| 39 | Grangeon   | 2019             | retrospective                   | ☆☆☆            | ☆☆                 | ☆☆                      | 7            |
| 40 | Indini     | 2019             | retrospective                   | ☆☆☆☆           | ☆☆                 | ☆☆☆                     | 9            |



|    |          |      |               |      |    |     |   |
|----|----------|------|---------------|------|----|-----|---|
| 41 | Ishihara | 2019 | retrospective | ☆☆☆  | ☆☆ | ☆   | 6 |
| 42 | Ksienski | 2019 | retrospective | ☆☆☆  | ☆  | ☆☆  | 6 |
| 43 | Lang     | 2019 | prospective   | ☆☆☆☆ | ☆☆ | ☆☆☆ | 9 |
| 44 | Lei M    | 2019 | retrospective | ☆☆☆☆ | ☆☆ | ☆☆☆ | 9 |
| 45 | Liew D   | 2019 | retrospective | ☆☆   | ☆☆ | ☆   | 5 |
| 46 | Okada    | 2019 | retrospective | ☆☆☆  | ☆  | ☆   | 5 |
| 47 | Okamoto  | 2019 | retrospective | ☆☆☆  | ☆  | ☆   | 5 |
| 48 | Ricciuti | 2019 | retrospective | ☆☆☆☆ | ☆☆ | ☆☆☆ | 9 |
| 49 | Rogado   | 2019 | retrospective | ☆☆☆☆ | ☆☆ | ☆☆☆ | 9 |
| 50 | Sakakida | 2019 | retrospective | ☆☆☆  | ☆☆ | ☆☆☆ | 8 |
| 51 | Verzoni  | 2019 | retrospective | ☆☆☆  | ☆☆ | ☆☆☆ | 8 |
| 52 | Yamauchi | 2019 | retrospective | ☆☆☆  | ☆☆ | ☆☆☆ | 8 |
